# Supplementary material for: Survival in Patients with Neuroendocrine Tumours of the Small Intestine: Nomogram Validation and Predictors of Survival
Source: PubMed Central journal article supplement (PMC7464451; doi:10.3390/jcm9082502), 2020-08-03
Supplement: jcm-09-02502-s001.pdf [file jcm-09-02502-s001.pdf]

Supplementary material

Table 1. Nomogram survival and actual DSS.

| Stratum    | Actual 5Y DSS | Nomogram 5YDSS | P      | Actual 10Y DSS | Nomogram 10YDSS | P      |
|------------|---------------|----------------|--------|----------------|-----------------|--------|
| Scenario 1 |               |                |        |                |                 |        |
| Low        | 0.82          | 0.86           | <0.001 | 0.69           | 0.68            | <0.001 |
| Medium     | 0.71          | 0.52           | <0.001 | 0.50           | 0.40            | <0.001 |
| High       | 0.53          | 0.26           | <0.001 | 0.35           | 0.20            | <0.001 |
| Scenario 2 |               |                |        |                |                 |        |
| Low        | 0.89          | 0.64           | <0.001 | 0.79           | 0.50            | <0.001 |
| Medium     | 0.70          | 0.25           | <0.001 | 0.46           | 0.20            | <0.001 |
| High       | 0.47          | 0.08           | <0.001 | 0.29           | 0.08            | <0.001 |

Stratum: column indicating low-, medium- or high risk groups based on nomogram scores; 5Y DSS: five year disease specific survival, 10Y DSS: 10-year disease specific survival.

Table 2. Nomogram survival and actual DSS.

|                           | Actual 5Y DSS | Nomogram 5YDSS | P      | Actual 10Y DSS | Nomogram 10YDSS | P      |
|---------------------------|---------------|----------------|--------|----------------|-----------------|--------|
| Scenario 1                |               |                |        |                |                 |        |
| <u>Curative surgery</u>   |               |                |        |                |                 |        |
| Low                       | 0.96          | 0.88           | <0.001 | 1              | 0.70            | <0.001 |
| Medium                    | 1             | 0.56           | <0.001 | 1              | 0.43            | <0.001 |
| High                      | 1             | 0.33           | <0.001 | 0.67           | 0.23            | <0.001 |
| <u>Palliative surgery</u> |               |                |        |                |                 |        |
| Low                       | 0.82          | 0.86           | <0.001 | 0.78           | 0.68            | <0.001 |
| Medium                    | 0.67          | 0.49           | <0.001 | 0.46           | 0.38            | <0.001 |
| High                      | 0.50          | 0.26           | <0.001 | 0.33           | 0.20            | <0.001 |
| <u>No surgery</u>         |               |                |        |                |                 |        |
| Low                       | 0.81          | 0.85           | <0.001 | 0.69           | 0.68            | <0.001 |
| Medium                    | 0.68          | 0.52           | <0.001 | 0.49           | 0.40            | <0.001 |
| High                      | 0.50          | 0.26           | <0.001 | 0.36           | 0.19            | <0.001 |
| Scenario 2                |               |                |        |                |                 |        |
| <u>Curative surgery</u>   |               |                |        |                |                 |        |
| Low                       | 0.93          | 0.69           | <0.001 | 1              | 0.54            | <0.001 |
| Medium                    | 1             | 0.23           | <0.001 | 1              | 0.16            | <0.001 |
| High                      | 1             | 0.08           | <0.001 | 0.67           | 0.08            | <0.001 |
| <u>Palliative surgery</u> |               |                |        |                |                 |        |
| Low                       | 0.83          | 0.67           | <0.001 | 0.78           | 0.53            | <0.001 |
| Medium                    | 0.67          | 0.24           | <0.001 | 0.42           | 0.18            | <0.001 |
| High                      | 0.50          | 0.08           | <0.001 | 0.36           | 0.08            | <0.001 |
| <u>No surgery</u>         |               |                |        |                |                 |        |
| Low                       | 0.91          | 0.59           | <0.001 | 0.74           | 0.45            | <0.001 |
| Medium                    | 0.69          | 0.23           | <0.001 | 0.36           | 0.18            | <0.001 |
| High                      | 0.45          | 0.08           | <0.001 | 0.30           | 0.08            | <0.001 |

Stratum: column indicating low-, medium- or high risk groups based on nomogram scores. 5Y DSS: 5-year disease specific survival, 10Y DSS: 10-year disease specific survival.
